# Supplementary material for: Co-doped V2O5 nanozyme with excellent peroxidase- and oxidase-like activities for efficient degradation of oxytetracycline without an activator
Source: Royal Society of Chemistry journal article supplement (doi:10.1039/d5nj00060b), 2025-01-01
Supplement: d5nj00060b1.pdf [file d5nj00060b1.pdf]

# Co-doped V<sub>2</sub>O<sub>5</sub> nanozyme with excellent peroxidase- and oxidase-like activities for efficient degradation of oxytetracycline without activator

Li Ruiyi, Yang Chen and Li Zaijun\*

Key Laboratory of Synthetic and Biological Colloids, Ministry of Education, School of Chemical and Material Engineering, and School of Life Science and Health Engineering, Jiangnan University, Wuxi 214122, China

## 1 Apparatus

Transmission electron microscope (TEM) images were conducted on JEOL 2010 FEG microscope at 200 keV. Fluorescence spectrum and intensity were measured on a Cary Eclipse fluorescence spectrophotometer (Agilent, Japan). Atomic force microscopic (AFM) images were taken by Multimode 8 Force Microscope (Bruker, Germany). Infrared spectra (IR) were recorded by Nicolet FT-IR 6700 spectrometer (Thermo Fisher Scientific Co., Ltd., America). UV-visible spectra were recorded on a TU-1901 spectrometer with DH-2000 deuterium and tungsten halogen light source in the absorbance mode (Beijing Purkinje General Instrument Co., Ltd., China). X-ray photoelectron spectroscopic (XPS) measurements were performed on the ESCALAB 250Xi photoemission spectrometer having Al K<sub>α</sub> (1486.6 eV) dual anode as the source operating at 14.6 kV of anode voltage and 13.5 mA filament current. The XPS data was collected with pass energy of 20 eV at 4x10<sup>-9</sup> m bar vacuum. Initially the XPS unit was calibrated using Fermi edge of Ag (KE 1482.544). The C 1s line of adventitious carbon with BE = 284.8 eV was taken as a reference for surface-charging corrections. The core-level spectra were decomposed into their components with mixed Gaussian-Lorentzian lines by a non-linear least squares curve-fitting procedure, using the CasaXPS software. The binding energies and FWHM of the peaks were determined from the fitting results. The polyacrylamide gel electrophoresis (PAGE) was imaged with BIO-RAD ChemiDoc XRs

## 2 Steady-state dynamic parameter measurement

Steady-state dynamic parameters for oxidation of 3,3',5,5'-tetramethylbenzidine (TMB) in the presence of H<sub>2</sub>O<sub>2</sub> under the catalysis of RSB-GQD@V<sub>2</sub>O<sub>5</sub>-Co were measured by varying the concentrations of H<sub>2</sub>O<sub>2</sub> and TMB. When H<sub>2</sub>O<sub>2</sub> was used as the substrate, the reaction system containing 0.1 mL of 10 mM TMB, 0.775 mL of acetate buffer solution of pH 4 and 0.1 mL of the H<sub>2</sub>O<sub>2</sub> solution with different concentration was mixed with 25 μL of 1 mg mL<sup>-1</sup> RSB-GQD@V<sub>2</sub>O<sub>5</sub>-Co dispersion. Subsequently, its change in the absorbance at 642 nm was monitored by spectrophotometer. When TMB was used as the substrate, the reaction system containing 0.1 mL of 10 mM H<sub>2</sub>O<sub>2</sub>, 0.775 mL of acetate buffer solution of

pH and 0.1 mL of the TMB solution with different concentration was mixed with 25  $\mu\text{L}$  of 1  $\text{mg mL}^{-1}$  RSB-GQD@V<sub>2</sub>O<sub>5</sub>-Co. Subsequently, its absorbance at 642 nm was monitored by spectrophotometer. The absorbance at 642 nm was used for calculating steady-state dynamic parameters by Lineweaver-Burk equation (1). In the equation, V, V<sub>max</sub>, [S] and K<sub>M</sub> present initial reaction rate, maximum reaction rate, substrate concentration and Michaelis-Menten constant, respectively. The above procedure was also used for calculating steady-state dynamic parameters for oxidation of TMB in the absence of H<sub>2</sub>O<sub>2</sub> under catalysis of RSB-GQD@V<sub>2</sub>O<sub>5</sub>-Co unless the replacement of H<sub>2</sub>O<sub>2</sub> solution with an equal volume of the acetate buffer solution of pH 4.0.

$$\frac{1}{V} = \frac{K_M}{V_{max}} \times \frac{1}{[S]} + \frac{1}{V_{max}} \quad (1)$$

### 3 Specific catalytic activity evaluation

To evaluate the peroxidase-like activity of RSB-GQD@V<sub>2</sub>O<sub>5</sub>-Co, the mixed solution containing 0.1 mL of 10 mM TMB, 0.1 mL of 10 mM H<sub>2</sub>O<sub>2</sub> and 0.775 mL of the acetate buffer solution (pH 4) was prepared. After 0.1 mL of 25  $\mu\text{L}$  of the RSB-GQD@V<sub>2</sub>O<sub>5</sub>-Co dispersion with different concentration, its absorbance at 652 nm and visible absorption spectrum were monitored by spectrophotometer. Further, the activity of RSB-GQD@V<sub>2</sub>O<sub>5</sub>-Co as the peroxidase-like nanozyme (b, U) was calculated by the equation (2).

$$b = \frac{V}{\varepsilon \times L} \times \frac{\Delta A}{\Delta t} \quad (2)$$

In the equation, V,  $\varepsilon$ , L and  $\Delta A/\Delta t$  presents the volume of reaction system, molar absorption coefficient of TMB (39000  $\text{M}^{-1} \text{cm}^{-1}$ ), optical length of cell and change rate of the absorbance at 642 nm with the reaction time, respectively. The specific activity of RSB-GQD@V<sub>2</sub>O<sub>5</sub>-Co (a, U  $\text{mg}^{-1}$ ) was calculated by the equation (3).

$$a = \frac{b}{m} \quad (3)$$

In the equation, m presents the mass (mg) of RSB-GQD@V<sub>2</sub>O<sub>5</sub>-Co in the reaction system. The above procedure was also used for evaluating the oxidase-like activity of RSB-GQD@V<sub>2</sub>O<sub>5</sub>-Co unless the replacement of H<sub>2</sub>O<sub>2</sub> solution in the model reaction system by an equal volume of the acetate buffer solution.

### 4. Figures and Tables

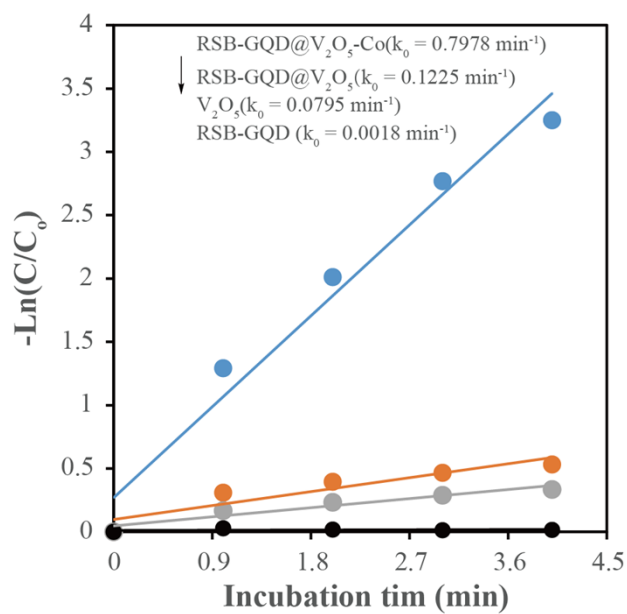

**Fig. s1** Plots of  $-\ln(C/C_0)$  vs. the incubation time under the catalysis of RSB-GQD, V<sub>2</sub>O<sub>5</sub>, RSB-GQD@V<sub>2</sub>O<sub>5</sub>, and RSB-GQD@V<sub>2</sub>O<sub>5</sub>-Co

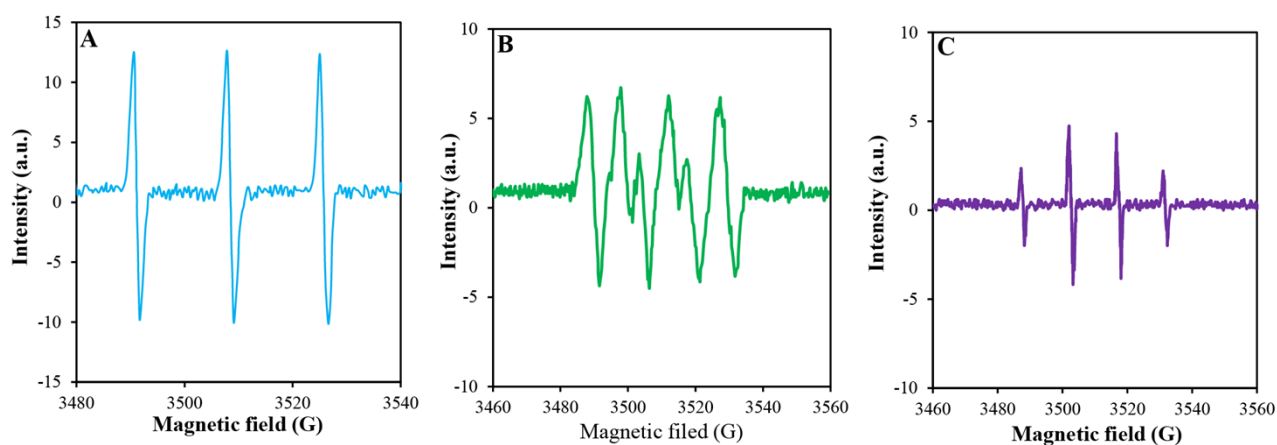

**Fig. s2** ESR spectra of radical adducts of DMPO-•OH (A), DMPO-•O<sub>2</sub><sup>-</sup> (B) and TEMP-<sup>1</sup>O<sub>2</sub> (C)

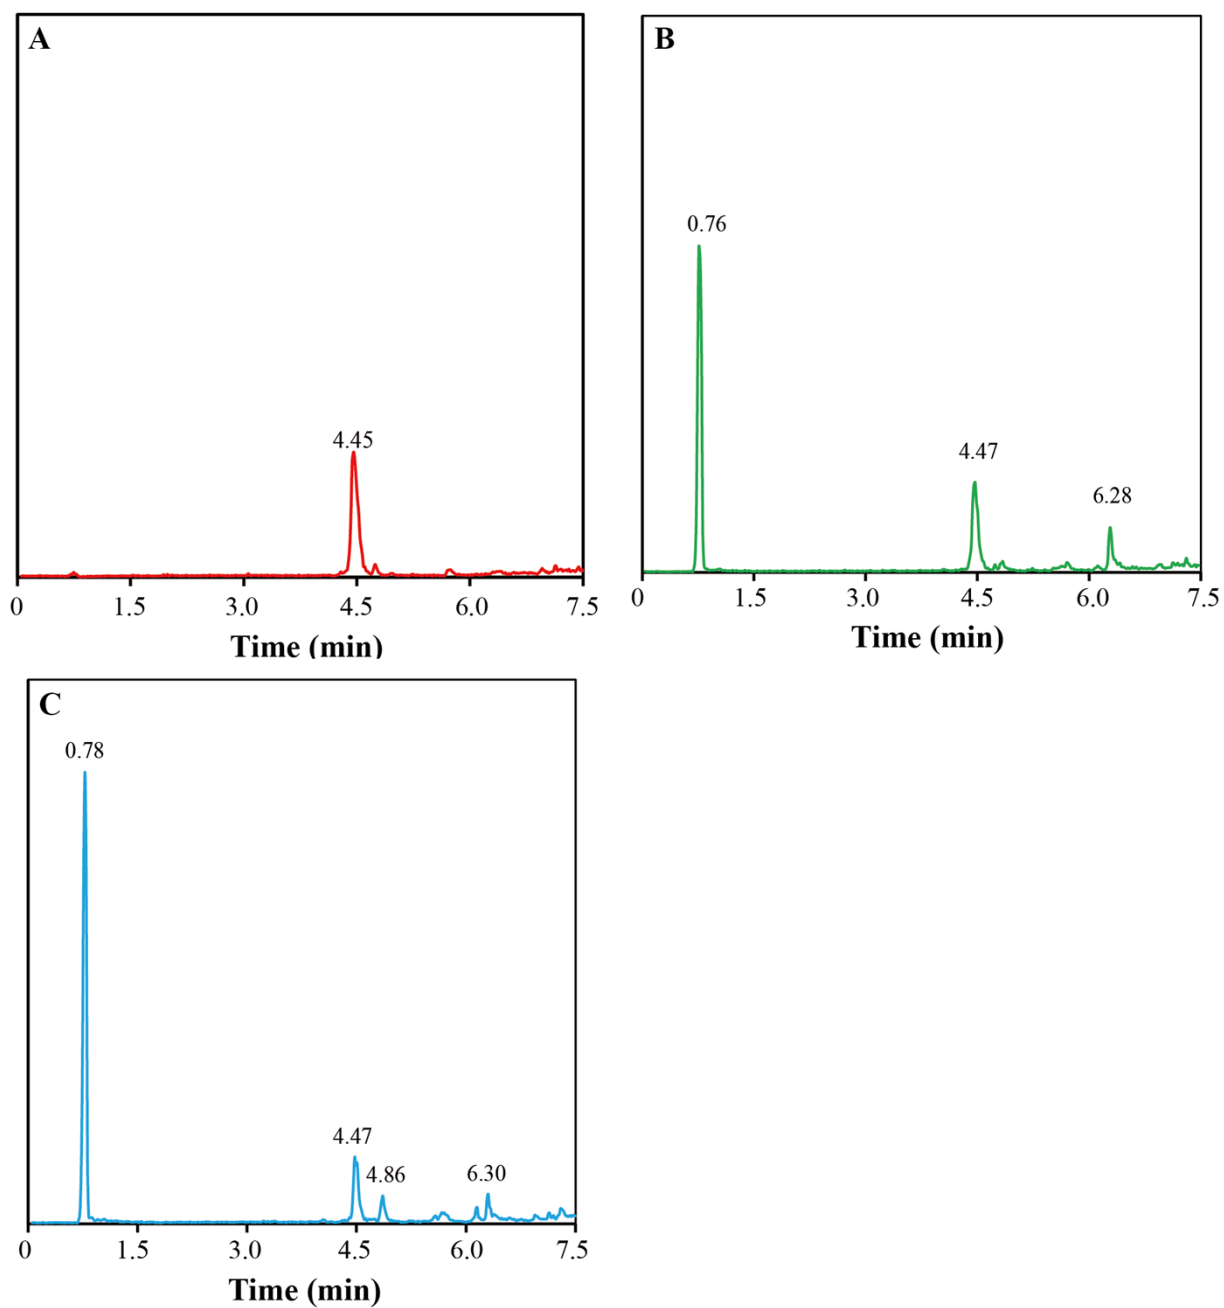

**Fig. s3** HPLC chromatograms of the oxytetracycline solution before (A) and after degraded 1 min (B) and 10 min (C) under catalysis of RSB-GQD@V<sub>2</sub>O<sub>5</sub>-Co

1

20231201-11A 254 (4.756)

1: TOF MS ES+  
87

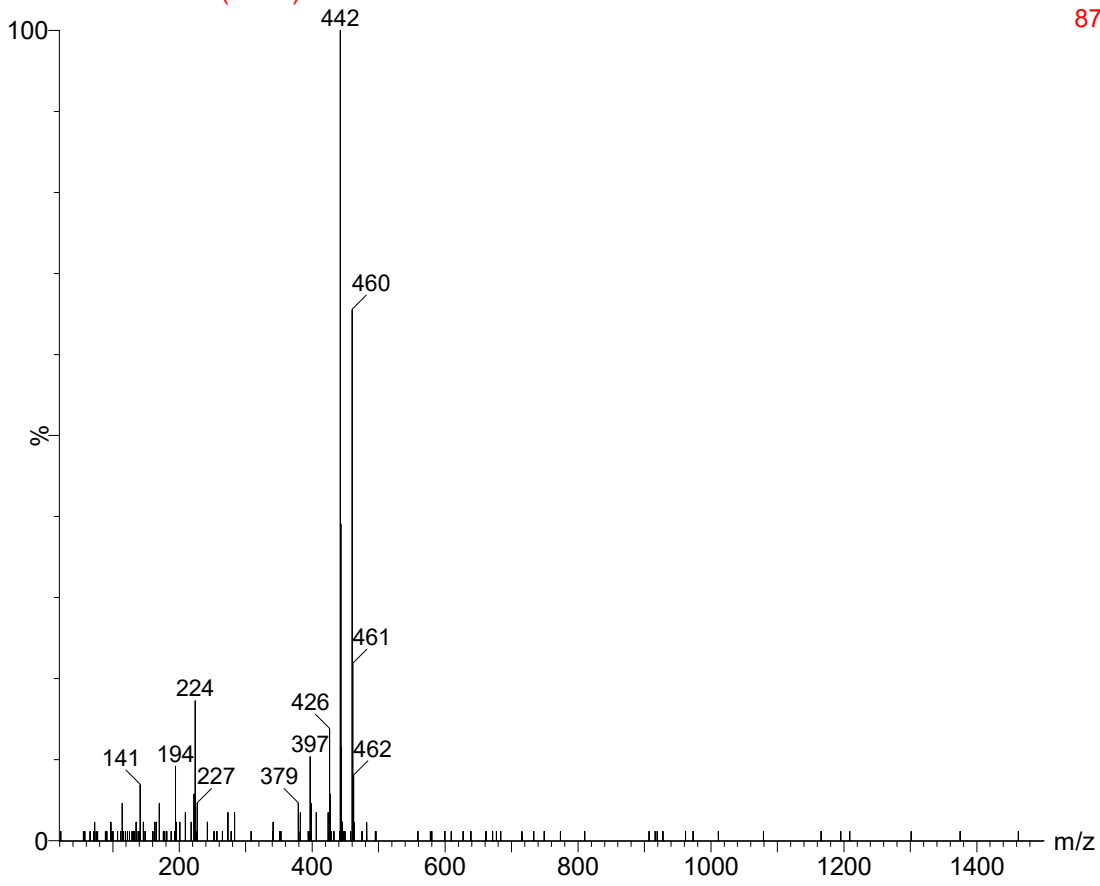

**Fig. s4** Mass spectrum of the oxytetracycline solution before degraded under catalysis of RSB-GQD@V<sub>2</sub>O<sub>5</sub>-Co

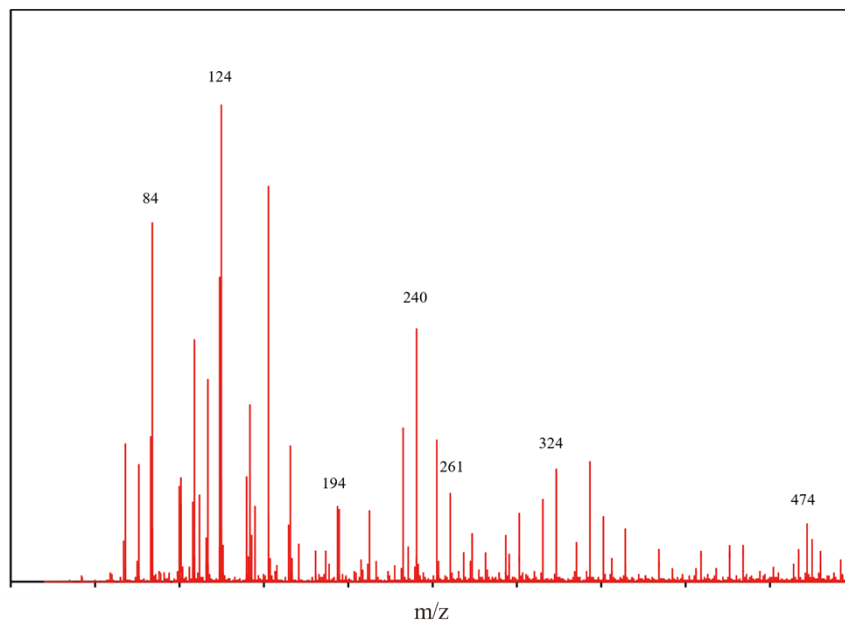

**Fig. s5** Mass spectrum of HPLC peak at 0.76 min of retention time

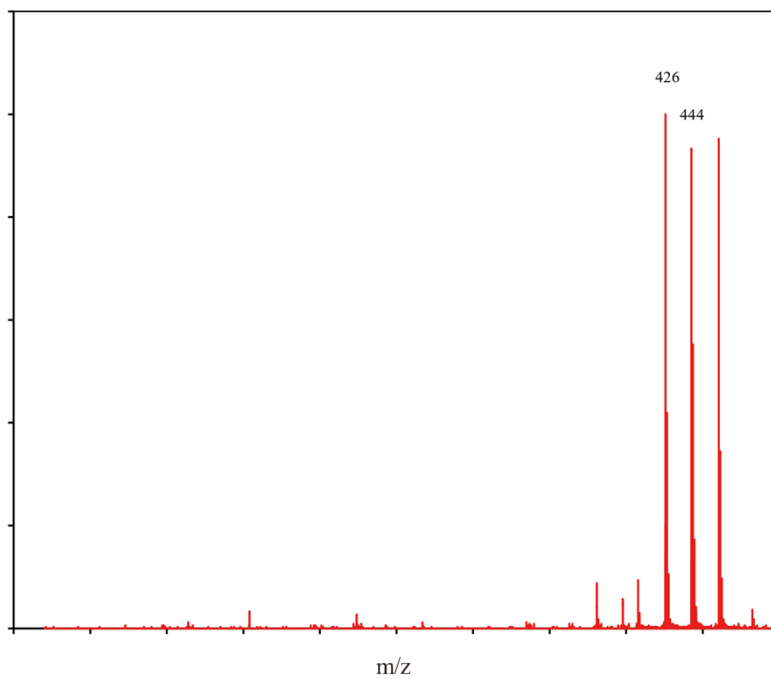

**Fig. s6** Mass spectrum of HPLC peak at 4.47 min of retention time

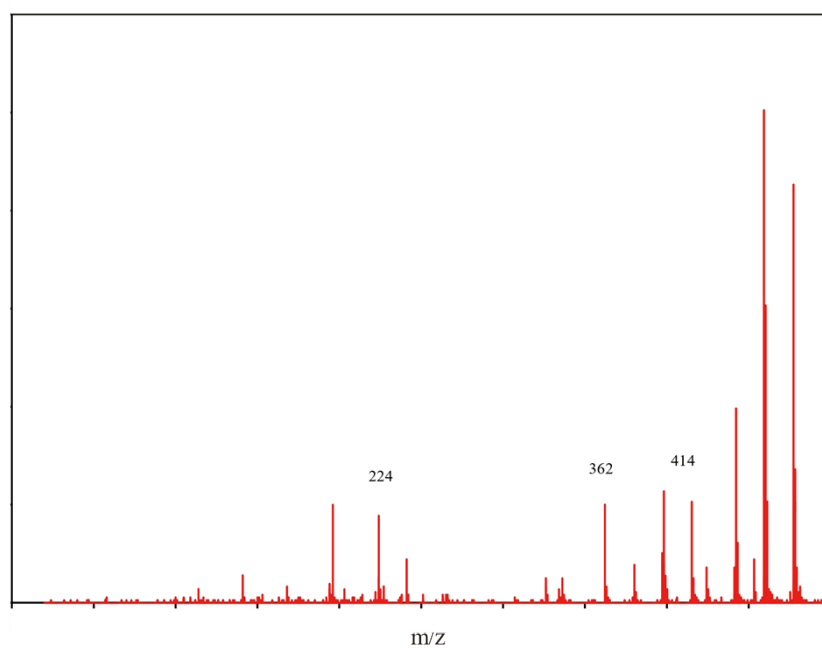

**Fig. s7** Mass spectrum of HPLC peak at 6.28 min of retention time

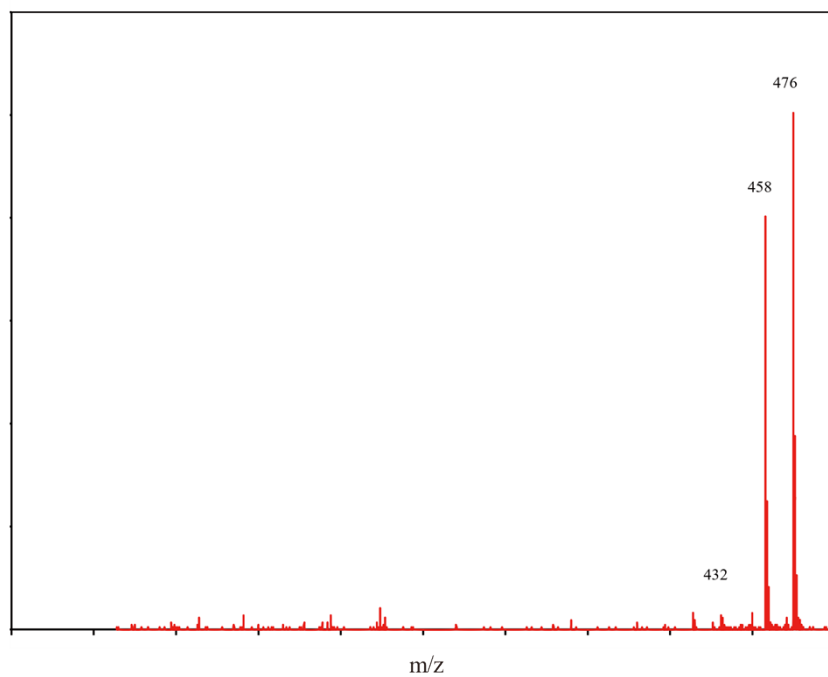

**Fig. s8** Mass spectrum of HPLC peak at 0.78 min of retention time

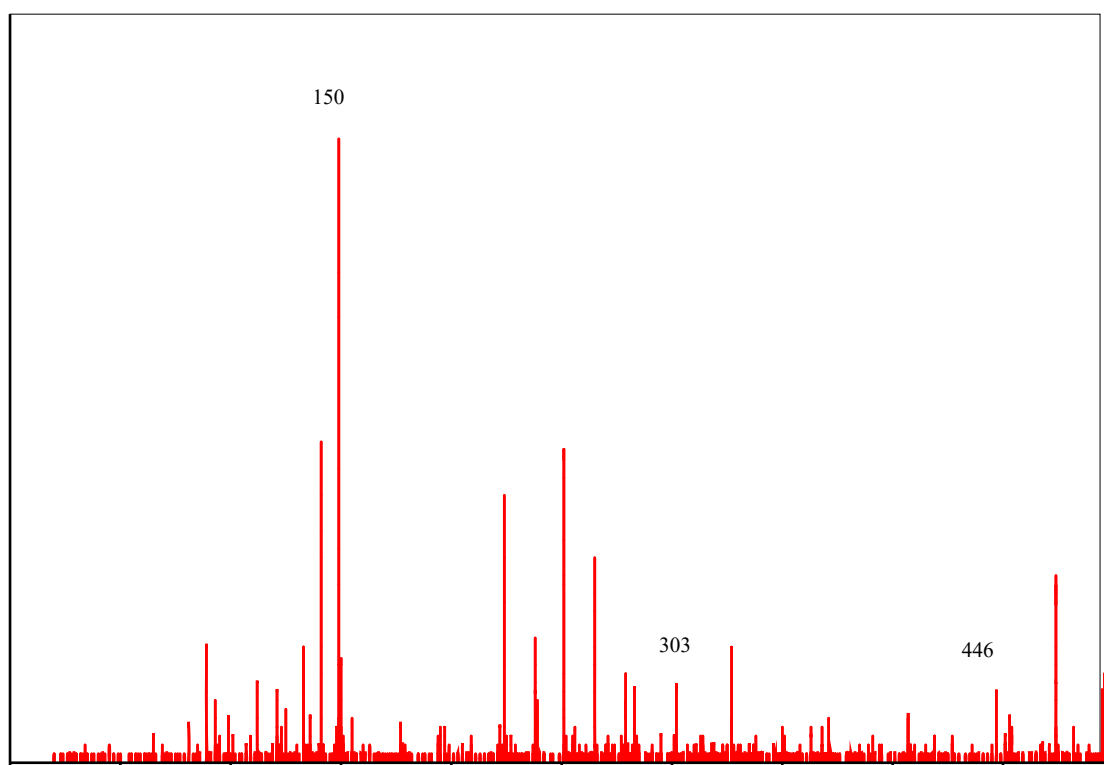

**Fig. s9** Mass spectrum of HPLC peak at 6.30 min of retention time

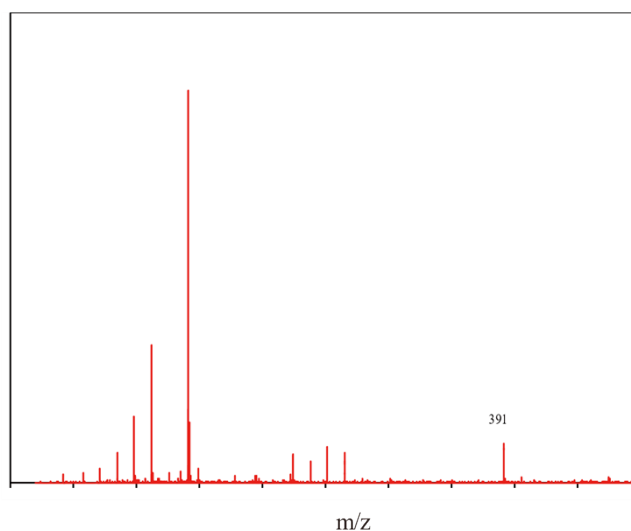

**Fig. s10** Mass spectrum of HPLC peak at 4.86 min of retention time

**Table s1** EIS of the electrode modification process

| Electrode modification process | $R_s$ ( $\Omega$ ) | $R_{ct}$ ( $\Omega$ ) | Capcitance(F) | Warburg, $Y_o$ |
|--------------------------------|--------------------|-----------------------|---------------|----------------|
| $V_2O_5$                       | 6.084              | 133.9                 | 1.04E-4       | 0.002994       |
| GQD- $V_2O_5$                  | 5.619              | 14.1                  | 9.388E-5      | 0.04668        |
| GQD- $V_2O_5$ -Co              | 7.477              | 1.231                 | 2.677E-4      | 0.06722        |

**Table s2** Comparison of catalytic activity of different nanozymes

| Nanozyme                                           | Enzyme-like activity | Specific activity<br>( $U\ mg^{-1}$ ) | Temperature<br>( $^{\circ}C$ ) | Ref. |
|----------------------------------------------------|----------------------|---------------------------------------|--------------------------------|------|
| $Fe_2O_3$ /carbon nanotubes                        | Peroxidase-like      | 25.4                                  | 37                             | [1]  |
| Cellulose nanofibrils-<br>supported PdNPs          | Peroxidase-like      | 0.415                                 | 30                             | [2]  |
|                                                    | Oxidase-like         | 0.277                                 | 30                             |      |
| Fe,N co-doped ultrathin<br>hollow carbon framework | Peroxidase-like      | 36.6                                  | 40                             | [3]  |
| N doped carbon                                     | Peroxidase-like      | 6.3                                   | 40                             | [4]  |
| Fe,N co-doped carbon                               | Peroxidase-like      | 15.2                                  | 40                             | [4]  |
| PdNPs/ TEMPO-oxidized<br>cellulose nanofibril      | Peroxidase-like      | 0.215                                 | 30                             | [4]  |
|                                                    | Oxidase-like         | 0.107                                 | 30                             |      |



|                                           |                 |        |                  |           |
|-------------------------------------------|-----------------|--------|------------------|-----------|
| Prussian blue nanoparticles               | Peroxidase-like | 465.8  | 37               | [5]       |
| Fe single-atom/Pt clusters                | Peroxidase-like | 87.7   | 37               | [6]       |
| AuPtCo                                    | Peroxidase-like | 27.1   | Room temperature | [7]       |
| RSB-GQD@V <sub>2</sub> O <sub>5</sub> -Co | Peroxidase-like | 893.35 | 25               | This work |
|                                           | Oxidase-like    | 125.95 | 25               |           |

---

## 5 References

- [1]. Y. C. Yang, T. Li, Y. Qin, L. B. Zhang and Y. Chen, Construct of Carbon Nanotube-Supported Fe<sub>2</sub>O<sub>3</sub> Hybrid Nanozyme by Atomic Layer Deposition for Highly Efficient Dopamine Sensing, *Front. Chem.*, 2020, 8, 564968.  
<https://doi.org/10.3389/fchem.2020.564968>
- [2]. R. Dadigala, R. Bandi, M. Alle, C. W. Park, S. Y. Han, G. J. Kwon and S. H. Lee, Effective fabrication of cellulose nanofibrils supported Pd nanoparticles as a novel nanozyme with peroxidase and oxidase-like activities for efficient dye degradation, *J. Hazard. Mater.*, 2022, **436**, 129165.  
<https://doi.org/10.1016/j.jhazmat.2022.129165>.
- [3]. J. Y. Hao, C. Zhang, C. X. Feng, Q. Wang, Z. Y. Liu, Y. Li, J. S. Mu, E. C. Yang and Y. Wang, An ultra-highly active nanozyme of Fe,N co-doped ultrathin hollow carbon framework for antibacterial application, *Chinese Chem. Lett.*, 2023, 34, 107650.  
<https://doi.org/10.1016/j.cclet.2022.06.073>.
- [4]. R. Dadigala, R. Bandi, S. Y. Han, G. J. Kwon and S. H. Lee, Rapid in-situ growth of enzyme-mimicking Pd nanoparticles on TEMPO-oxidized nanocellulose for the efficient detection of ascorbic acid, *Int. J. Biol. Macromol.*, 2023, 234, 123657.  
<https://doi.org/10.1016/j.ijbiomac.2023.123657>.
- [5]. Z. G. Qin, B. Chen, Y. Mao, C. Shi, Y. Li, X. Huang, F. Yang and N. Gu, Achieving Ultrasmall Prussian Blue Nanoparticles as HighPerformance Biomedical Agents with Multifunctions, *ACS Appl. Mater. Interfaces*, 2020, 12, 57382-57390.  
<https://dx.doi.org/10.1021/acsami.0c18357>.
- [6]. Y. F. Chen, L. Jiao, H. Y. Yan, W. Q. Xu, Y. Wu, L. R. Zheng, W. L. Gu and C. Z. Zhu, Fe–N–C Single-Atom Catalyst Coupling with Pt Clusters Boosts Peroxidase-like Activity for Cascade-Amplified Colorimetric Immunoassay, *Anal. Chem.*, 2021, 93, 12353-12359.  
<https://doi.org/10.1021/acs.analchem.1c02115>.
- [7]. X. Y. Zhou, C. Fan, Q. W. Tian, C. H. Han, Z. Q. Yin, Z. Y. Dong and S. Bi, Trimetallic AuPtCo Nanopolyhedrons with Peroxidase- and Catalase-Like Catalytic Activity for Glow-Type Chemiluminescence Bioanalysis, *Anal. Chem.*, 2022, 94, 847-855.  
<https://doi.org/10.1021/acs.analchem.1c03572>.
